# Supplementary material for: Estimation and update of betweenness centrality with progressive algorithm and shortest paths approximation
Source: Springer Nature journal article supplement (doi:10.1038/s41598-023-44392-0), 2023-10-10
Supplement: 41598_2023_44392_MOESM1_ESM.pdf [file 41598_2023_44392_MOESM1_ESM.pdf]

## Supplementary Material

### Appendix A.1

We prove Theorem 2.1.

#### Theorem 2.1:

Let  $\mathcal{F}$  be a family of functions from domain  $P$  to  $[0,1]$ , for each  $f \in \mathcal{F}$  taken the probability uniform distribution  $\mu$  over the  $P$ , it holds:

$$\text{var} = \sup_{f \in \mathcal{F}} E_{\mu}[f^2]. \quad (1)$$

Proof: Due to the normalization factor of  $\frac{1}{n(n-1)}$ , the value of BC is almost zero, especially on large-scale networks<sup>1</sup>. It is reasonable to be considered:

$$\text{var} = E_{\mu}[f^2] - \{E(f)\}^2 \leq E_{\mu}[f^2].$$

### Appendix A.2

We are now ready to prove Theorem 2.2. Our most significant technical contributions are in this paper.

#### Theorem 2.2:

For  $k, m \geq 1$  and the function  $f \in \mathcal{F}$ , where  $\mathcal{F}$  be a family of functions from  $P$  to  $[0,1]$ . Let  $\lambda \in \{-1, +1\}^{k \times m}$  be an  $k \times m$  matrix of Rademacher random variables, so that  $\lambda \in \{-1, +1\}$  independently and with equal probability  $\frac{1}{2}$ . Let  $S$  be a sample size of  $m$  drawn i.i.d. from  $P$ , taken a distribution  $\mu$ . For each  $\delta \in (0, 1)$ , define:

$$\begin{aligned} V(f) &\doteq \alpha + \frac{\ln \frac{3}{\delta}}{m} + \sqrt{\left(\frac{\ln \frac{3}{\delta}}{m}\right)^2 + \frac{2\alpha \ln \frac{3}{\delta}}{m}} \\ \tilde{R}(\mathcal{F}, S) &\doteq \tilde{R}_m^k(\mathcal{F}, S, \sigma) + \frac{2\ln \frac{3}{\delta}}{km} + \sqrt{\left(\frac{2\ln \frac{3}{\delta}}{km}\right)^2 + \frac{4(\tilde{R}_m^k(\mathcal{F}, S, \lambda) + \alpha) \ln \frac{3}{\delta}}{km}} \\ R(\mathcal{F}, m) &\doteq \tilde{R}(\mathcal{F}, S) + \frac{\ln \frac{3}{\delta}}{m} + \sqrt{\left(\frac{\ln \frac{3}{\delta}}{m}\right)^2 + \frac{2\tilde{R}(\mathcal{F}, S) \ln \frac{3}{\delta}}{m}} \\ \varepsilon &\doteq 2R(\mathcal{F}, m) + \frac{\ln \frac{3}{\delta}}{3m} + \sqrt{\left(\frac{\ln \frac{3}{\delta}}{3m}\right)^2 + \frac{2R(\mathcal{F}, m) \ln \frac{3}{\delta}}{m}}, \end{aligned} \quad (2)$$

With the probability at least  $1 - \delta$  over the choice of  $S$  and  $\lambda$ .

We first prove the origin of each formula in four steps.

#### Step 1:

##### Theorem A.2.1 (Thm.7.5.8<sup>2</sup>):

With probability  $\geq 1 - \eta$  over  $S$ , it holds:

$$\sup_{f \in \mathcal{F}} E(f^2) \leq \alpha + \frac{\ln \frac{1}{\eta}}{m} + \sqrt{\left(\frac{\ln \frac{1}{\eta}}{m}\right)^2 + \frac{2\alpha \ln \frac{1}{\eta}}{m}}.$$

Proof: From Theorem 2.1,  $V(f) = \sup_{f \in \mathcal{F}} E(f^2)$ , thus replacing  $\frac{1}{\lambda}$  with  $\frac{3}{\delta}$ , we can obtain the result.

#### Step 2:

Before proving that  $\tilde{R}(\mathcal{F}, S) \doteq \tilde{R}_m^k(\mathcal{F}, S, \lambda) + \frac{2\ln \frac{3}{\delta}}{nm} + \sqrt{\left(\frac{2\ln \frac{3}{\delta}}{nm}\right)^2 + \frac{4(\tilde{R}_m^k(\mathcal{F}, S, \lambda) + \alpha) \ln \frac{3}{\delta}}{nm}}$ , we need to define two functions that we need to use: the self-boundary function and  $g_{j,i}(\sigma)$ .

##### Definition 1: $(\varphi, \gamma)$ -self-bounding function

Let  $X = (X_1, \dots, X_n)$  be a vector of random variables  $X_i$ , each taking values in a measurable set  $\chi$  and let  $g: \chi^n \mapsto \mathbb{R}$  be a non-negative measurable function. The denote  $g_i$  a function from  $\chi^{n-1} \mapsto \mathbb{R}$ .

A function  $g$  is a  $(\varphi, \gamma)$ -self-bounding function, for each  $X \in \chi^n$ :

$$\begin{aligned}
& 0 \leq g(X) - g_i(X^{(i)}) \leq 1 \\
& \sum_{i=1}^n \{g(X) - g_i(X^{(i)})\} \leq \phi g(X) + \gamma,
\end{aligned} \tag{3}$$

where  $X^{(i)} = (X_1, \dots, X_{i-1}, X_{i+1}, \dots, X_N) \in \mathcal{X}^{n-1}$ .

**Theorem A.2.2:**

Let  $\sigma \in \{-1, +1\}^{n \times m}$  be a  $n \times m$  matrix, define the function of  $g(\sigma)$ :

$$g(\sigma) \doteq nm\tilde{R}_m^n(\mathcal{F}, m, \sigma), \tag{4}$$

$g(\sigma)$  is a self-bounding function of  $(1, 2nm\alpha)$ . Where  $\alpha = \sup_{f \in \mathcal{F}} \frac{1}{m} \sum_{i=1}^m (f(s_i))^2$ .

**Definition 2:** the function of  $g_{j,i}(\sigma)$ , for  $j \in [1, n]$  and  $i \in [1, m]$  is defined as:

$$\begin{aligned}
g_{j,i}(\sigma) \doteq & \inf_{\sigma'_{j,i} \in \{-1, +1\}} \left\{ \sum_{q=1, q \neq j}^n \left[ \sup_{f \in \mathcal{F}} \sum_{z=1}^m f(s_z) \sigma_{q,z} \right] + \right. \\
& \left. \sup_{f \in \mathcal{F}} \left\{ \sum_{z=1, z \neq i}^m (\sigma_{j,z} f(s_z)) + (\sigma'_{j,i} f(s_i)) \right\} \right\},
\end{aligned}$$

we denote by  $g(\sigma)$  the function that replaces the element  $\sigma_{j,i}$  at the position  $(i, j)$  of  $\sigma$  with  $\sigma'$ , and we take the smallest value over  $\sigma'$ .

**Proof of Theorem A.2.2:**

Now proceed to prove Theorem A.2.2, i.e., prove that:

$$\begin{aligned}
& 0 \leq g(\sigma) - g_{j,i}(\sigma) \leq 1 \\
& \sum_{j=1}^n \sum_{i=1}^m (g(\sigma) - g_{j,i}(\sigma))^2 \leq \phi g(\sigma) + \gamma, (\phi, \gamma) \geq 0.
\end{aligned}$$

First, we can rewrite  $g(\sigma)$  as the following:

$$\begin{aligned}
g_{j,i}(\sigma) = & \min \left[ \sum_{q=1, q \neq j}^n \left[ \sup_{f \in \mathcal{F}} \sum_{z=1}^m \sigma_{q,z} f(s_z) \right] + \sup_{f \in \mathcal{F}} \left\{ \sum_{z=1, z \neq i}^m (\sigma_{j,z} f(s_z) - f(s_i)) \right\}, \right. \\
& \left. \sum_{q=1, q \neq j}^n \left[ \sup_{f \in \mathcal{F}} \sum_{z=1}^m \sigma_{q,z} f(s_z) \right] + \sup_{f \in \mathcal{F}} \left\{ \sum_{z=1, z \neq i}^m (\sigma_{j,z} f(s_z) + f(s_i)) \right\} \right].
\end{aligned}$$

It is easy to see that at least one element of this min equation is equal to  $g(\sigma)$ , so the minimum is either  $g(\sigma)$  or smaller than  $g(\sigma)$ . Next, we start the proof of Theorem A.2.2 that:

$$\begin{aligned}
g_{j,i}(\sigma) \doteq & \inf_{\sigma'_{j,i} \in \{-1, +1\}} \sum_{q=1, q \neq j}^n \left[ \sup_{f \in \mathcal{F}} \sum_{z=1}^m \sigma_{q,z} f(s_z) \right] + \sup_{f \in \mathcal{F}} \left\{ \sum_{z=1, z \neq i}^m (\sigma_{j,z} f(s_z) + \sigma'_{j,i} f(s_i)) \right\} \\
= & \sum_{q=1, q \neq j}^n \left[ \sup_{f \in \mathcal{F}} \sum_{z=1}^m \sigma_{q,z} f(s_z) \right] + \inf_{\sigma'_{j,i}} \left\{ \sup_{f \in \mathcal{F}} \left\{ \sum_{z=1, z \neq i}^m (\sigma_{j,i} f(s_z)) + \sigma'_{j,i} f(s_i) \right\} \right\} \\
\geq & \sum_{q=1, q \neq j}^n \left[ \sup_{f \in \mathcal{F}} \sum_{z=1}^m \sigma_{q,z} f(s_z) \right] + \sup_{f \in \mathcal{F}} \left\{ \inf_{\sigma'_{j,i} \in \{-1, +1\}} \left\{ \sum_{z=1, z \neq i}^m (\sigma_{j,i} f(s_z)) + \sigma'_{j,i} f(s_i) \right\} \right\} \\
= & \sum_{q=1, q \neq j}^n \left[ \sup_{f \in \mathcal{F}} \sum_{z=1}^m \sigma_{q,z} f(s_z) \right] + \sup_{f \in \mathcal{F}} \left\{ \sum_{z=1, z \neq i}^m (\sigma_{j,i} f(s_z)) + \inf_{\sigma'_{j,i} \in \{-1, +1\}} \left\{ \sigma'_{j,i} f(s_i) \right\} \right\}.
\end{aligned}$$

For a given  $\sigma$ , let  $f_j^*$  be one of the functions of  $\mathcal{F}$  attaining the supremum of  $\sup_{f \in \mathcal{F}} \sum_{z=1}^m \sigma_{j,i} f(s_z)$ . Thus, We can keep writing this up here:

$$\begin{aligned}
g_{j,i}(\sigma) &\geq \sum_{q=1, q \neq j}^n \left[ \sup_{f \in \mathcal{F}} \sum_{z=1}^m \sigma_{q,z} f(s_z) \right] + \sup_{f \in \mathcal{F}} \left\{ \sum_{z=1, z \neq i}^m (\sigma_{j,i} f(s_z)) + \inf_{\sigma'_{j,i} \in \{-1, +1\}} \{ \sigma'_{j,i} f(s_i) \} \right\} \\
&\geq \sum_{q=1, q \neq j}^n \left[ \sup_{f \in \mathcal{F}} \sum_{z=1}^m \sigma_{q,z} f(s_z) \right] + \sum_{z=1, z \neq i}^m (\sigma_{j,i} f_j^*(s_z)) + \inf_{\sigma'_{j,i} \in \{-1, +1\}} \{ \sigma'_{j,i} f_j^*(s_i) \} \\
&= \sum_{q=1, q \neq j}^n \left[ \sup_{f \in \mathcal{F}} \sum_{z=1}^m \sigma_{q,z} f(s_z) \right] + \sum_{z=1, z \neq i}^m (\sigma_{j,i} f_j^*(s_z)) + \sigma_{j,i} f_j^*(s_i) - \sigma_{j,i} f_j^*(s_i) \\
&\quad + \inf_{\sigma'_{j,i} \in \{-1, +1\}} \{ \sigma'_{j,i} f_j^*(s_i) \} \\
&= g(\sigma) - \sigma_{j,i} f_j^*(s_i) + \inf_{\sigma'_{j,i} \in \{-1, +1\}} \{ \sigma'_{j,i} f_j^*(s_i) \},
\end{aligned}$$

where  $f_j^*(s_i) \in [0, 1]$ , we can obtain that:  $g_{j,i}(\sigma) \geq g(\sigma) - \sigma_{j,i} f_j^*(s_i) - |f_j^*(s_i)| \geq g(\sigma) - 1$ .  
Now, the proof of  $\phi = 1, \gamma = 2nm$  as follows:

$$\begin{aligned}
\sum_{j=1}^n \sum_{i=1}^m \left( g(\sigma) - g_{j,i}(\sigma) \right)^2 &\leq \sum_{j=1}^n \sum_{i=1}^m \left( \sigma_{j,i} f_j^*(s_i) + |f_j^*(s_i)| \right)^2 \\
&= \sum_{j=1}^n \sum_{i=1}^m \left( [\sigma_{j,i} f_j^*(s_i)]^2 + |f_j^*(s_i)|^2 + 2\sigma_{j,i} f_j^*(s_i) |f_j^*(s_i)| \right) \\
&= \sum_{j=1}^n \sum_{i=1}^m \left( 2f_j^*(s_i)^2 + 2\sigma_{j,i} f_j^*(s_i) |f_j^*(s_i)| \right) \\
&\leq \sum_{j=1}^n \sum_{i=1}^m \sigma_{j,i} f_j^*(s_i) + 2 \sum_{j=1}^n \sum_{i=1}^m f_j^*(s_i)^2 \\
&= g(\sigma) + 2 \sum_{j=1}^n \sum_{i=1}^m f_j^*(s_i)^2 \\
&\leq g(\sigma) + 2n \sup_{f \in \mathcal{F}} \sum_{i=1}^m (f(s_i))^2 \\
&= g(\sigma) + 2nm\alpha,
\end{aligned}$$

obtaining the statement.

**Theorem A.2.3<sup>3</sup>**

let  $\lambda \in \{-1, +1\}^{n \times m}$  be an  $n \times m$  matrix of matrix of Rademcher random variables,  $\lambda_{j,i} \in \{-1, +1\}$  with probability  $\frac{1}{2}$  taken each one and independent. Then, for all  $0 \leq \tau \leq \tilde{R}(\mathcal{F}, S)$ :

$$Pr(\tilde{R}(\mathcal{F}, S) \geq \tilde{R}_m^n(\mathcal{F}, S, \lambda) + \tau) \leq \exp\left(-\frac{nm\tau^2}{4(\tilde{R}(\mathcal{F}, S) + \alpha)}\right). \quad (5)$$

Theorem A.2.3 plays a role in solving the second formula, so we prove it as follows:

The function of  $f$ , defines:

$$\hat{\mathcal{F}} \doteq \hat{f}(x) \doteq \frac{f(x)}{2} : f \in \mathcal{F}, \forall x \in \mathcal{X}.$$

With theorem A.2.2, we know that  $g(\sigma) = nm\tilde{R}_m^n(\hat{F}, S, \lambda)$  is a  $1, 2nm\sigma$  self-bounding function. It is easily to get the statement that  $E_\lambda[nm\tilde{R}_m^n(\hat{\mathcal{F}}, S, \lambda)] = nm\tilde{R}(\hat{\mathcal{F}}, S)$ . We apply (Theorem.7<sup>3</sup>), obtaining:

$$\Pr(nm\tilde{R}(\mathcal{F}, S) \geq nm\tilde{R}_m^n(\mathcal{F}, S, \lambda) + t) \leq \exp\left(-\frac{t^2}{2(nm\tilde{R}(\mathcal{F}, S) + 2nm\alpha)}\right), \quad (6)$$

we use the fact that  $\tilde{R}(\mathcal{F}, S) = \frac{\tilde{R}(\mathcal{F}, S)}{2}$ ,  $\tilde{R}_m^n(\mathcal{F}, S, \lambda) = \frac{\tilde{R}_m^n(\mathcal{F}, S, \lambda)}{2}$  and  $\alpha_{\mathcal{F}} = \frac{\alpha}{4}$ .  
It follows that:

$$\Pr\left(\frac{nm}{2}\tilde{R}(\mathcal{F}, S) \geq \frac{nm}{2}\tilde{R}_m^n(\mathcal{F}, S, \lambda) + t\right) \leq \exp\left(-\frac{t^2}{nm(\tilde{R}(\mathcal{F}, S) + \alpha)}\right), \quad (7)$$

replacing  $t$  by  $\frac{\tau nm}{2}$  achieve the Theorem A.2.3.

The proof of the key equation begins below:

$$\tilde{R}(\mathcal{F}, S) = \tilde{R}_m^n(\mathcal{F}, S, \lambda) + \frac{2\ln\frac{1}{\delta}}{nm} + \sqrt{\left(\frac{2\ln\frac{1}{\delta}}{nm}\right)^2 + \frac{4(\tilde{R}_m^n(\mathcal{F}, S, \lambda) + \alpha)\ln\frac{1}{\delta}}{nm}}.$$

**Proof: From Theorem A.2.3**, we have the fact that, with probability  $\geq 1 - \delta$ ,

$$\tilde{R}(\mathcal{F}, S) \leq \tilde{R}_m^n(\mathcal{F}, S, \lambda) + \sqrt{\frac{4(\tilde{R}(\mathcal{F}, S) + \alpha)\ln\frac{1}{\delta}}{nm}}.$$

The bound of  $\tilde{R}(\mathcal{F}, S)$  can be obtained by the function of  $b(x)$ , which can find the fixed point.

$$b(x) \doteq \tilde{R}_m^n(\mathcal{F}, S, \lambda) + \sqrt{\frac{4(x + \alpha)\ln\frac{1}{\delta}}{nm}}.$$

**Lemma 1.** *let  $d, j, v \geq 0$ . The fixed point of*

$$b(x) \doteq d + \sqrt{j + vx},$$

is at

$$x \doteq d + \frac{v}{2} + \sqrt{\frac{v^2}{4} + j + vj}.$$

Therefore, we apply lemma 1 to obtain the statement.

**Step 3:**

We have rigorously proved the two formulas before, and then our main technical proof Theorem 2.2 is based on the concentration inequality for Rademacher Averages, for the supremum deviation  $S(\mathcal{F}, S) = \sup_{f \in \mathcal{F}} |\rho_S(f) - \rho_\mu(f)|$ . To facilitate

the discussion, we write  $S(\mathcal{F}, S)$  as  $Z^4$ .

We now start to describe. Then, define the *Rademacher complexity (RC)*  $R(\mathcal{F}, m)$  of a set of functions  $\mathcal{F}$  as the expectation of the ERA over  $S$ .  $R(\mathcal{F}, m) \doteq E_S[\tilde{R}(\mathcal{F}, S)]$ . The following central results correlate  $\tilde{R}(\mathcal{F}, m)$  with the expected supremum deviation.

**Lemma 2.** *Symmetrization lemma<sup>5</sup>*

$$E_S[Z] \leq 2R(\mathcal{F}, m). \quad (8)$$

The following shows the deviation of the variance-dependent constraint above its expected value.

**Theorem A.2.4<sup>6</sup>** *Let  $Z = \sup_{f \in \mathcal{F}} |\rho_S(f) - \rho_\mu(f)|$ . Then, with probability at least  $1 - \lambda$  over  $S$ , it holds*

$$Z \leq E[Z] + \frac{\ln \frac{1}{\lambda}}{3m} + \sqrt{\left(\frac{\ln \frac{1}{\lambda}}{3m}\right)^2 + \frac{2(E[Z] + 1)\ln \frac{1}{\lambda}}{m}}.$$

We apply lemma 2. to Theorem A.2.3 can obtain

$$\varepsilon \doteq 2R(\mathcal{F}, m) + \frac{\ln \frac{1}{\lambda}}{3m} + \sqrt{\left(\frac{\ln \frac{1}{\lambda}}{3m}\right)^2 + \frac{2R(\mathcal{F}, m)\ln \frac{1}{\lambda}}{m}},$$

the next result bounds  $R(\mathcal{F}, m)$  above its estimated  $\tilde{R}(\mathcal{F}, S)$ .

**Step 4:**

**Theorem A.2.5.**<sup>7</sup>

With probability  $\geq 1 - \lambda$  over  $S$ , it holds

$$R(\mathcal{F}, m) \leq \tilde{R}(\mathcal{F}, S) + \frac{\ln \frac{1}{\lambda}}{m} + \sqrt{\left(\frac{\ln \frac{1}{\lambda}}{m}\right)^2 + \frac{2\tilde{R}(\mathcal{F}, S)\ln \frac{1}{\lambda}}{m}}.$$

**Conclusion:**

Now we prove Theorem 2.2 in its entirety, the most important part in our paper.

Proof. In the 4 formulas for our most vital results, replace  $\frac{3}{8}$  with  $\frac{1}{\lambda}$  to obtain Theorem 2.2.

### Appendix A.3

We now prove Theorem 3.1, which provides probabilistic quality assurance for the CBCA algorithm.

**Theorem 3.1:**

With probability at least  $1 - \delta$  for the CBCA algorithm, the output  $(\tilde{B}, \varepsilon)$ , such that  $|b(v) - \tilde{b}(v)| \leq \varepsilon$ .

Before proving, we need to understand the following facts will improve the efficiency of proof.

Facts:

- (1). At the end of each iteration, the wimpy variance  $V(f)$ , for any  $f \in \mathcal{F}$ , can be computed by replacing  $\delta$  with probability  $\frac{\delta}{2^{i+1}}$  by the Eq.(2) in Theorem 2.2.
- (2). At the end of each iteration, Monte Carlo empirical Rademacher, empirical Rademacher values, and Rademacher values, for any  $f \in \mathcal{F}$ , can be computed by replacing  $\delta$  with probability  $\frac{\delta}{2^{i+1}}$  by the Eq.(2) in Theorem 2.2.
- (3). At the end of each iteration,  $\varepsilon$ , for any  $f \in \mathcal{F}$ , can be computed by replacing  $\delta$  with probability  $\frac{\delta}{2^{i+1}}$  by the Eq.(2) in Theorem 2.2.
- (4). After sampling  $m$  samples, the maximum error  $S(\mathcal{F}, S)$  is at most  $\varepsilon$  (i.e.,  $m_i \geq m_1$ ), and the probability is  $1 - \frac{\delta}{2}$ . (this can refer to the Matteo<sup>8</sup>)
- (5). For each  $i \geq 1$ ,  $S_i = \{m_1, \dots, m_{s_i}\}$  is the set of  $S_i$  independent uniform samples from  $P$ .

The probability in Theorem 3.1 is taken on all realizations of sequence  $S_i$ , that is, on all realizations of sequence  $m_j$ .

Proof: Let events  $E1$  and  $E2$  be defined as:

$$E1 = \{\exists i \geq 1 \text{ s.t. } |b(v) - \tilde{b}(v)| > \varepsilon\}$$

$$E2 = \{\exists j, i \geq 1 \text{ s.t. } |b(v) - \tilde{b}_{s_{ij}}(v)| > \varepsilon\}.$$

It can be known that the output of the algorithm satisfies the  $\varepsilon$ -approximation condition when both events  $E1, E2$  are wrong. Thus, we only need to prove  $Pr(E1 \cup E2) \leq \delta$ .

For statement the sake of fact (4), we can obtain that  $Pr(E1) \leq \frac{\delta}{2}$ .

In consideration of fact (1)(2)(3)(5), we can be calculated:

$$Pr(E2) = Pr(\exists j, i \text{ s.t. } |b(v) - \tilde{b}_{s_{ij}}(v)| > \varepsilon) \leq \sum_i Pr(|b(v) - \tilde{b}_{s_{ij}}(v)| > \varepsilon)$$

$$\leq \sum_i \frac{\delta}{2^{i+1}} \leq \frac{\delta}{2}.$$

We can obtain that

$$\Pr(E1 \cup E2) \leq \Pr(E1) + \Pr(E2) \leq \delta.$$

## References

1. Cousins, C., C. Wohlgemuth & Riondato, M. Bavarian: Betweenness centrality approximation with variance-aware rademacher averages. *acm transactions on knowledge discovery from data*. *ACM Transactions on Knowl. Discov. from Data* **17(6)**, 1–47, DOI: [10.1145/3577021](https://doi.org/10.1145/3577021) (2023).
2. Pellegrina, L. & Vandin, F. Efficient mining of the most significant patterns with permutation testing. *Assoc. for Comput. Mach.* 2070–2079, DOI: [10.1145/3219819.3219997](https://doi.org/10.1145/3219819.3219997) (2018).
3. Pellegrina, L. Sharper convergence bounds of monte carlo rademacher averages through self-bounding functions. *arXiv e-prints* arXiv:2010.12103, DOI: [10.48550/arXiv.2010.12103](https://doi.org/10.48550/arXiv.2010.12103) (2020).
4. Shalev-Shwartz, S. & Ben-David, S. Understanding machine learning: From theory to algorithms. *Camb. university press* (2014).
5. Mitzenmacher, M. & Upfal, E. Probability and computing: Randomization and probabilistic techniques in algorithms and data analysis. *Camb. university press* (2017).
6. Cousins, C. & Riondato, M. Sharp uniform convergence bounds through empirical centralization. *Adv. Neural Inf. Process. Syst.* **33**, 15123–15132 (2020).
7. Boucheron, G., S. Lugosi & Massart, P. Concentration inequalities: A nonasymptotic theory of independence. *Oxf. university press* (2013).
8. Riondato, M. & Kornaropoulos, E. M. Fast approximation of betweenness centrality through sampling. *Proc. 7th ACM international conference on Web search data mining* 413–422, DOI: [10.1145/2556195.2556224](https://doi.org/10.1145/2556195.2556224) (2014).
